# Supplementary material
Source: publisher site journal article supplement (https://www.spandidos-publications.com/8444/downloadSupplementary)
Supplement: Supplementary file 1 [file downloadSupplementary]

Table SI. Multiple biological activities of Nuciferine.

| A, Anti-inflammatory effects |                                               |                                             |                                                                                                                                                                        |                                                                                                                                                                                                                                                |         |
|------------------------------|-----------------------------------------------|---------------------------------------------|------------------------------------------------------------------------------------------------------------------------------------------------------------------------|------------------------------------------------------------------------------------------------------------------------------------------------------------------------------------------------------------------------------------------------|---------|
| First author, year           | Models                                        | Doses                                       | Biological activities                                                                                                                                                  | Molecular targets                                                                                                                                                                                                                              | (Refs.) |
| Wang, 2016                   | Fructose-fed rats<br><br>HK-2 cells           | 7, 14 and 28 mg/kg<br><br>2.5-40 $\mu$ M    | Attenuates fructose-induced hyperuricemia, dyslipidemia and systemic inflammation<br><br>Inhibits TLR4/PI3K/NF- $\kappa$ B signaling and NLRP3 inflammasome activation | TLR4 $\downarrow$ , MyD88 $\downarrow$ , PI3K $\downarrow$ , ILK $\downarrow$ , p-Akt $\downarrow$ , p-p65 $\downarrow$ , NLRP3 $\downarrow$ , IL-1 $\beta$ $\downarrow$ , TNF- $\alpha$ $\downarrow$ , IL-6 $\downarrow$ , MCP-1 $\downarrow$ | (33)    |
| Wu, 2017                     | LPS-induced RAW264.7 cells<br><br>BALB/c mice | 10 and 20 $\mu$ g/ml<br><br>10 and 20 mg/kg | Reduces the lung wet/dry ratio and myeloperoxidase activity<br><br>Improves alveolar hyperemia, alveolar wall thickening and inflammatory cell infiltration            | IL-6 $\downarrow$ , IL-1 $\beta$ $\downarrow$ , IL-10 $\uparrow$ , TLR4 $\downarrow$ , NF- $\kappa$ B $\downarrow$ p-p65 $\downarrow$ , TNF- $\alpha$ $\downarrow$ , I $\kappa$ B $\alpha$ $\downarrow$                                        | (10)    |
| Yang, 2017                   | Mouse tracheal rings                          | 100 and 300 $\mu$ M                         | Inhibits Ca <sup>2+</sup> influx and VDLCCs, NSCCs; relaxes high K <sup>+</sup> -precontracted TRs                                                                     | NA                                                                                                                                                                                                                                             | (128)   |

|             |                                                                              |                                                |                                                                                                                                                |                                                                                                                           |       |
|-------------|------------------------------------------------------------------------------|------------------------------------------------|------------------------------------------------------------------------------------------------------------------------------------------------|---------------------------------------------------------------------------------------------------------------------------|-------|
| Chen, 2018  | LPS-induced mouse mastitis model<br><br>Mouse mammary epithelial cells       | 10, 15 and 20 mg/kg<br><br>10, 15 and 20 µg/ml | Alleviates mammary gland floccules injury and inflammatory cell infiltration                                                                   | TLR4 ↓ ,<br>NF-κB ↓<br>p-p65 ↓ ,<br>p-IκBα ↓<br>,<br>IL-1β ↓ ,<br>TNF-α ↓                                                 | (35)  |
| Zhang, 2018 | LPS-stimulated BV2 microglial cells                                          | 5, 10 and 20 µM                                | Attenuates LPS-induced inflammation                                                                                                            | PGE <sub>2</sub> ↓,<br>NO ↓ ,<br>PPARγ↑,<br>TNF-α ↓ ,<br>p-p65 ↓ ,<br>p-IκBα ↓<br>,<br>IL-1β ↓                            | (38)  |
| Zhang, 2018 | LPS-induced RAW264.7 cells                                                   | 1, 10, 30 and 50 µM                            | Attenuates LPS-induced inflammation                                                                                                            | PPARα↑,<br>PPARγ↑,<br>TNF-α ↓ ,<br>NF-κB ↓<br>,<br>IκBα ↓ ,<br>IL-6 ↓                                                     | (68)  |
| Cui, 2020   | HFD-induced NAFLD rat model                                                  | 20 mg/kg                                       | Decreases the expression of inflammatory factors                                                                                               | IL-6 ↓ ,<br>IL-1β ↓ ,<br>TNF-α ↓                                                                                          | (130) |
| Li, 2021    | Folic acid-induced mice acute kidney injury<br><br>HK-2 cells and 293T cells | 30 mg/kg<br><br>5, 10, 20 and 40 µM            | Alleviates renal fibrosis, promotes renal regeneration, prevents iron accumulation and lipid peroxidation, mitigates RSL3-induced ferroptosis, | MCP-1 ↓<br>, Fn14 ↓ ,<br>TWEAK ↓ ,<br>GSH↑,<br>PCNA↑,<br>ROS ↓ ,<br>TNF-α ↓ ,<br>MDA ↓ ,<br>fibronectin ↓ ,<br>COL1A1 ↓ , | (34)  |

|             |                            |                          |                                                                                                    |                                                                                                                                                                                                                                           |       |
|-------------|----------------------------|--------------------------|----------------------------------------------------------------------------------------------------|-------------------------------------------------------------------------------------------------------------------------------------------------------------------------------------------------------------------------------------------|-------|
|             |                            |                          | suppresses ROS generation                                                                          | IL-6 ↓ ,<br>FTL ↓ ,<br>FTH ↓ ,<br>FDN1 ↑ ,<br>TfR1 ↑ ,<br>GPX4 ↑ ,<br>SLC7A1<br>1 ↑ ,<br>FSP1 ↑                                                                                                                                           |       |
| Xiong, 2021 | Obese model mice           | 20 mg/kg                 | Decreases body weight of obese mice, Lee's index and adipocyte volume, and improves dysbacteriosis | TNF-α ↓ ,<br>IL-1β ↓ ,<br>IL-6 ↓ ,<br>ZO-1 ↑ ,<br>occludin ↑                                                                                                                                                                              | (129) |
| Kim, 2022   | LPS-induced RAW264.7 cells | 6.25, 12.5, 25 and 50 μM | Prevents inflammatory response                                                                     | NO ↓ ,<br>PGE <sub>2</sub> ↓ ,<br>NF-κB<br>p65 ↓ ,<br>iNOS ↓ ,<br>COX-2 ↓<br>,<br>AP-1 ↓ ,<br>ATF2 ↓ ,<br>p-IKK ↓ ,<br>MKK3 ↓<br>,<br>MKK6 ↓<br>,<br>p38<br>AMPK ↓<br>,<br>p-p38 ↓ ,<br>p-AFT2<br>↓ ,<br>TNF-α ↓ ,<br>IL-1β ↓ ,<br>IL-6 ↓ | (39)  |

|                           |                                                                              |                                                  |                                                                                                                                                  |                                                                                  |         |
|---------------------------|------------------------------------------------------------------------------|--------------------------------------------------|--------------------------------------------------------------------------------------------------------------------------------------------------|----------------------------------------------------------------------------------|---------|
| Zhu, 2022                 | DSS-induced ulcerative colitis mouse model                                   | 10 and 20 mg/kg                                  | Improves histological injury and colon shortening, promotes T-cell proliferation and differentiation, restores the Th1/Th2 and Th17/Treg balance | ZO-1↑, occludin↑                                                                 | (9)     |
| Kulhari, 2023             | LPS-stimulated RAW 264.7 cells<br><br>DSS-induced ulcerative colitis in mice | 0.31, 0.63 and 1.25 µg/ml<br><br>20 and 40 mg/kg | Inhibits oxidative stress-mediated ROS generation and inflammatory responses<br><br>Improves the DAI and histological alterations                | iNOS ↓, IL-1β ↓, IL-18 ↓, TNF-α ↓, NF-κB ↓, MAPK ↓, NLRP3 ↓, claudin-1 ↑, ZO-1 ↑ | (36)    |
| Li, 2024                  | OGD/R-induced PC12 cells<br><br>MCAO/R-induced rats                          | 6.25, 12.5 and 25 µM<br><br>20, 40 and 80 mg/kg  | Reduces the inflammatory level of cerebral ischemia-reperfusion injury                                                                           | TNF-α ↓, IL-6 ↓, PI3K ↓, Akt ↓, NF-κB ↓, NLRP3 ↓                                 | (37)    |
| B, Anti-lipogenic effects |                                                                              |                                                  |                                                                                                                                                  |                                                                                  |         |
| First author, year        | Models                                                                       | Doses                                            | Biological activities                                                                                                                            | Molecular targets                                                                | (Refs.) |

|             |                                            |                            |                                                                         |                                                                                                                                                                                |      |
|-------------|--------------------------------------------|----------------------------|-------------------------------------------------------------------------|--------------------------------------------------------------------------------------------------------------------------------------------------------------------------------|------|
| Guo, 2013   | High-fat diet-fed hamsters                 | 10 and 15 mg/kg            | Ameliorates HFD-induced dyslipidemia, liver steatosis and injury        | PPAR $\alpha$ ↑, FAS ↓, CD36 ↓, SREBP-1 ↓, $\beta$ -HBA↑, CPT-1↑, MTP↑, ApoB↑, MDA ↓, CYP2E1 ↓, TNF- $\alpha$ ↓                                                                | (65) |
| Zhang, 2015 | Oleic acid-induced HepG2 cells             | 4, 8, 16 and 32 $\mu$ g/ml | Inhibits lipid accumulation and inflammation, and decreases fatty acids | TNF- $\alpha$ ↓, IL-6 ↓, IL-8 ↓, MDA ↓, T-AOC↑, IL-10↑, SOD↑, PASK ↓, SREBP-1c ↓, FAS ↓, ACC ↓, SCD1, PPAR $\alpha$ ↓, PPAR $\gamma$ ↓, AMPK↑, Akt↑, p-AMPK↑, NF- $\kappa$ B ↓ | (67) |
| Ma, 2015    | Insulin-resistant 3T3-L1 mature adipocytes | 2 mg/l                     | Decreases lipid accumulation, increases glucose uptake and              | GLUT4↑, p-AMPK↑                                                                                                                                                                | (20) |

|            |                                                  |                       |                                                                                                                 |                                                                                                                                                                                                                 |       |
|------------|--------------------------------------------------|-----------------------|-----------------------------------------------------------------------------------------------------------------|-----------------------------------------------------------------------------------------------------------------------------------------------------------------------------------------------------------------|-------|
|            |                                                  |                       | ameliorates insulin resistance                                                                                  |                                                                                                                                                                                                                 |       |
| Zhan, 2018 | HFD/STZ-induced diabetic mice<br><br>HepG2 cells | NA<br><br>10 $\mu$ M  | Improves lipid profile and attenuates hepatic steatosis                                                         | PPAR- $\alpha$ $\uparrow$ ,<br>ACOX1 $\uparrow$<br>,<br>Ehhadh $\uparrow$ ,<br>Fgf21 $\uparrow$ ,<br>PGC1 $\alpha$ $\uparrow$                                                                                   | (68)  |
| Ning, 2019 | STZ-induced diabetic rat model                   | 200 mg/kg             | Decreases liver steatosis and injury                                                                            | SREBP-1c $\downarrow$ ,<br>LXP- $\alpha$ $\downarrow$ ,<br>ACC1 $\downarrow$ ,<br>SCD-1 $\downarrow$<br>,<br>FAS $\downarrow$ ,<br>ACC2 $\uparrow$ ,<br>PPAR $\alpha$ $\uparrow$ ,<br>CPT-1 $\alpha$ $\uparrow$ | (69)  |
| Zhou, 2020 | 1-day-old Broiler chickens                       | 25, 100 and 400 mg/kg | Reduces fat deposition, decreases hepatic triglyceride and total cholesterol concentrations                     | HMGCR $\downarrow$ ,<br>SREBP-2 $\downarrow$ ,<br>ACC $\downarrow$ ,<br>SREBP-1c $\downarrow$ ,<br>LXR- $\alpha$ $\uparrow$ ,<br>CYP7A1 $\uparrow$ ,<br>CPT-1 $\uparrow$                                        | (19)  |
| Wang, 2020 | HFD-fed rats                                     | 10 mg/kg              | Improves the lipid profile and liver function, prevents hepatic fatty deposition and reduces lipid accumulation | TC $\downarrow$ ,<br>TG $\downarrow$ ,<br>LDLC $\downarrow$ ,<br>ALT $\downarrow$ ,<br>ALP $\downarrow$                                                                                                         | (133) |

|                          |                                  |                                                    |                                                                                                                                     |                                                                                                                                                                                                                                                          |         |
|--------------------------|----------------------------------|----------------------------------------------------|-------------------------------------------------------------------------------------------------------------------------------------|----------------------------------------------------------------------------------------------------------------------------------------------------------------------------------------------------------------------------------------------------------|---------|
| Yu, 2021                 | HFD-fed mice                     | 7.5, 15 and 30 mg/kg                               | Alleviates liver steatosis, and enriches <i>Akkermansia muciniphila</i> and <i>Bacteroides uniformis</i>                            | NA                                                                                                                                                                                                                                                       | (21)    |
| Xu, 2021                 | 3T3-L1 preadipocytes             | 0-20 $\mu$ M                                       | Inhibits 3T3-L1 preadipocyte proliferation and differentiation, attenuates lipid accumulation and reduces intracellular TG contents | PPAR $\gamma$ $\downarrow$ ,<br>C/EBP $\alpha$ $\downarrow$ ,<br>C/EBP $\beta$ $\downarrow$ ,<br>FAS $\downarrow$ ,<br>ACC $\downarrow$ ,<br>HSL $\downarrow$ ,<br>ATGL $\downarrow$ ,<br>SREBP-1 $\downarrow$ ,<br>FGF21 $\uparrow$ ,<br>ZAG $\uparrow$ | (70)    |
| C, Antioxidative effects |                                  |                                                    |                                                                                                                                     |                                                                                                                                                                                                                                                          |         |
| First author, year       | Models                           | Doses                                              | Biological activities                                                                                                               | Molecular targets                                                                                                                                                                                                                                        | (Refs.) |
| Liu, 2014                | AGS cells and DU-145 cells       | IC <sub>50</sub> , 21 $\pm$ 0.5 $\mu$ M            | Displays antioxidative activity                                                                                                     | NA                                                                                                                                                                                                                                                       | (131)   |
| Harishkumar, 2020        | H9c2 cells                       | 0-200 $\mu$ M;<br>IC <sub>50</sub> , 33.28 $\mu$ M | Mitigates DOX-mediated free radicals                                                                                                | SOD $\uparrow$ ,<br>CAT $\uparrow$ ,<br>GSH $\uparrow$ ,<br>MDA $\downarrow$ ,<br>ROS $\downarrow$                                                                                                                                                       | (45)    |
| Cui, 2020                | HFD-induced NAFLD rat model      | 20 mg/kg                                           | Inhibits oxidative stress                                                                                                           | SOD $\uparrow$ ,<br>GSH-Px $\uparrow$ ,<br>MDA $\downarrow$                                                                                                                                                                                              | (130)   |
| Harishkumar, 2022        | Isoproterenol-induced myocardial | 10 and 20 mg/kg                                    | Reduces lipid peroxidation,                                                                                                         | SOD $\uparrow$ ,<br>CAT $\uparrow$ ,<br>MDA $\downarrow$ ,                                                                                                                                                                                               | (85)    |

|                                      | infarction rat model                             |                                                   | prevents ISO-mediated lipid bilayer damage and mitigates ISO-induced oxidative stress | ROS ↓                                                                                                                                             |         |
|--------------------------------------|--------------------------------------------------|---------------------------------------------------|---------------------------------------------------------------------------------------|---------------------------------------------------------------------------------------------------------------------------------------------------|---------|
| D, Cardiovascular protective effects |                                                  |                                                   |                                                                                       |                                                                                                                                                   |         |
| First author, year                   | Models                                           | Doses                                             | Biological activities                                                                 | Molecular targets                                                                                                                                 | (Refs.) |
| Wang, 2015                           | SD rats, HUVECs and vascular smooth muscle cells | 1, 3 and 10 $\mu$ M                               | Induces relaxation of mesenteric arteries and suppresses $Ca^{2+}$ influx             | p-eNOS $\uparrow$ , NO $\uparrow$                                                                                                                 | (81)    |
| Harishkumar, 2021                    | Zebrafish embryo and H9c2 cardiomyocytes         | 10, 20, 50, 100 and 200 $\mu$ M                   | Reduces doxorubicin-mediated cardiotoxicity                                           | Caspase 8 $\downarrow$ , Caspase 3/7 $\downarrow$ , Caspase 9 $\downarrow$ , Bax $\downarrow$ , Bcl-2 $\uparrow$ , Cyto-c $\downarrow$            | (84)    |
| Harishkumar, 2022                    | Isoproterenol-induced myocardial infarction rats | 10 and 20 mg/kg                                   | Reduces levels of serum biomarkers and maintains cardiac rhythm                       | LDH $\downarrow$ , CK-B $\downarrow$ , CK-MB $\downarrow$ , caspase 9 $\downarrow$ , caspase 3 $\downarrow$ , Bax $\downarrow$ , Bcl-2 $\uparrow$ | (85)    |
| Deng, 2022                           | SD rat thoracic aorta<br><br>HUVECs              | 0.3-2.4 $\mu$ M;<br>EC <sub>50</sub> , 0.36 $\pm$ | Promotes vasodilation and inhibits ROCCs and SR $Ca^{2+}$                             | ICAM-1 $\downarrow$ , cGMP $\downarrow$                                                                                                           | (82)    |

|                            |                                                                                           |                                                      |                                                                                                                                                                                      |                                                                                                                                        |         |
|----------------------------|-------------------------------------------------------------------------------------------|------------------------------------------------------|--------------------------------------------------------------------------------------------------------------------------------------------------------------------------------------|----------------------------------------------------------------------------------------------------------------------------------------|---------|
|                            |                                                                                           | 0.02<br>μM                                           | release to relax<br>thoracic aorta                                                                                                                                                   |                                                                                                                                        |         |
|                            |                                                                                           | 1-100<br>μM                                          | Mediates the<br>NO/cGMP<br>signaling<br>pathway and<br>activates the<br>KIR channel to<br>HUVECs                                                                                     |                                                                                                                                        |         |
| Xiao, 2023                 | HFD-fed<br>ApoE(-/-)<br>mice<br><br>Mouse<br>aortic<br>vascular<br>smooth<br>muscle cells | 5, 10<br>and 40<br>mg/kg<br><br>1, 5<br>and 10<br>μM | Ameliorates<br>the aortic<br>lesion and<br>vascular<br>plaque,<br>attenuates the<br>migration and<br>proliferation of<br>VSMCs and<br>suppresses<br>Calm4/MMP1<br>2/Akt<br>signaling | Calm4↓,<br>MMP12↓<br>,<br>p-Akt↓                                                                                                       | (87)    |
| E, Neuroprotective effects |                                                                                           |                                                      |                                                                                                                                                                                      |                                                                                                                                        |         |
| First author,<br>year      | Models                                                                                    | Doses                                                | Biological<br>activities                                                                                                                                                             | Molecula<br>r targets                                                                                                                  | (Refs.) |
| Wu, 2020                   | MCAO-<br>induced<br>stroke rat<br>model                                                   | 10, 20<br>and 40<br>mg/kg                            | Improves<br>neurological<br>deficit scores,<br>and<br>ameliorates<br>cerebral edema<br>and infarction                                                                                | S1P↑,<br>oxoglutar<br>ic acid ↓,<br>TUDCA↑<br>,<br>PLA2↑,<br>12/15-<br>LOX↑,<br>SPHK↑,<br>IDH↑,<br>GOT1↑,<br>CYP2B↑,<br>FADS↑,<br>GPT↑ | (72)    |

|                                       |                                      |                                     |                                                                                                                                                                 |                                                                |         |
|---------------------------------------|--------------------------------------|-------------------------------------|-----------------------------------------------------------------------------------------------------------------------------------------------------------------|----------------------------------------------------------------|---------|
| Chen C, 2022                          | Acute ischemic stroke rat model      | 10, 20 and 40 mg/kg                 | Reduces cerebral infarction, and improves survival rates and neurological deficits                                                                              | MDA ↓ , SOD↑, T-AOC↑, GSH/GS SG↑, TNF-α ↓ , IL-1β ↓            | (11)    |
| Khan, 2022                            | Alloxan-induced diabetic albino rats | 10 mg/kg                            | Reduces blood glucose, restores body weight, recovers acetylcholinesterase activity, and displays potent inhibitory effects against α-glucosidase and α-amylase | SOD↑, CAT↑, GSH↑, GPx↑                                         | (73)    |
| Chen C, 2022                          | MCAO rat model                       | 40 mg/kg                            | Alleviates brain damage                                                                                                                                         | PPARγ↑, SIP↑, Rac1 ↓ , PGH <sub>2</sub> ↓ , PGE <sub>2</sub> ↓ | (74)    |
| F, Musculoskeletal protective effects |                                      |                                     |                                                                                                                                                                 |                                                                |         |
| First author, year                    | Models                               | Doses                               | Biological activities                                                                                                                                           | Molecular targets                                              | (Refs.) |
| Kang, 2017                            | BMMs                                 | 0-40 μM; IC <sub>50</sub> , 17.9 μM | Inhibits RANKL-induced osteoclast genesis and osteoclast-mediated bone resorption                                                                               | Cathepsin K ↓ , MMP-9 ↓                                        | (98)    |
| Song, 2020                            | Bone marrow-derived macrophages      | 0-30 μM                             | Decreases multinucleated osteoclast formation,                                                                                                                  | p-ERK1/2 ↓ , p-JNK ↓ , p-p38 ↓ ,                               | (76)    |

|           |                                              |                                          |                                                                                                                                                                    |                                                                                                           |      |
|-----------|----------------------------------------------|------------------------------------------|--------------------------------------------------------------------------------------------------------------------------------------------------------------------|-----------------------------------------------------------------------------------------------------------|------|
|           | Ovariectomized mice                          | 40 mg/kg                                 | promotes type H vessel formation, increases the quantity of Trap <sup>+</sup> preosteoclasts and increases the PDGF-BB concentration                               | p-IκBα ↓, c-FOS ↓, NFATc1 ↓, Trap ↓, MMP-9 ↓, DC-STAMP ↓, ATP6V0 D2 ↓, p-p65 ↓, p-IKKα/β ↓, CTX-I ↓, OCN↑ |      |
| Wen, 2021 | Primary rat chondrocytes<br><br>Rat OA model | 0, 10, 20, 40 and 100 μM<br><br>30 mg/kg | Ameliorates the progression of OA, alleviates ECM degradation, inhibits the production of inflammatory mediators and inhibits the PI3K/Akt/NF-κB signaling pathway | MMP13 ↓, Col-II↑, ADAMTS5 ↓, iNOS ↓, COX-2 ↓, p-PI3K ↓, p65 ↓                                             | (77) |
| Guo, 2024 | Raw264.7 cells                               | 30 μM                                    | Inhibits osteoclast formation, inhibits glycolysis metabolism and ROS production, inactivates NF-κB and                                                            | c-Fos ↓, NFATc1 ↓, HK2 ↓, PKM2 ↓, LDHA ↓, Nox1 ↓, TRF6 ↓,                                                 | (12) |

|                                 |                                                              |                                                |                                                                                                                                   |                                                                                      |         |
|---------------------------------|--------------------------------------------------------------|------------------------------------------------|-----------------------------------------------------------------------------------------------------------------------------------|--------------------------------------------------------------------------------------|---------|
|                                 |                                                              |                                                | MAPK signaling pathways                                                                                                           | GTP-Rac1 ↓, HO-1↑, GSR↑                                                              |         |
| Peng, 2024                      | Mouse chondrocytes<br><br>DMM surgery-induced OA mouse model | 0, 6.25, 12.5 and 25 μM<br><br>40 mg/kg        | Ameliorates osteoarthritis, activates the PTEN/SIRT1/NF-κB pathway, exerts anti-inflammatory effects and improves ECM degradation | iNOS ↓, PEG2 ↓, IL-6 ↓, ADAMTS-5 ↓, MMP-13 ↓, PTEN↑, p-Akt ↓, p65 ↓                  | (78)    |
| Wang, 2024                      | MH7A FLS cells<br><br>CIA rat model                          | 0, 20, 40 and 80 μmol/l<br><br>20 and 60 mg/kg | Decreases the proliferation and invasiveness of FLS cells and corrects Th17/Treg cell imbalance                                   | Cyclin D1 ↓, Cyclin E1 ↓, CDK2 ↓, CDK4 ↓, Caspase 3↑, Bcl-2 ↓, Bax↑, IL-17↑, IL-10 ↓ | (79)    |
| Kulhari, 2024                   | CFA-mediated arthritis rat model                             | 5 and 10 mg/kg                                 | Inhibits the TLR4/NF-κB/MAPK signaling axis and alleviates adjuvant-induced arthritis                                             | iNOS ↓, COX-2 ↓, TLR4 ↓, MAPK ↓, p65 ↓, IκB-α ↓                                      | (80)    |
| G, Metabolic regulatory effects |                                                              |                                                |                                                                                                                                   |                                                                                      |         |
| First author, year              | Models                                                       | Doses                                          | Biological activities                                                                                                             | Molecular targets                                                                    | (Refs.) |

|              |                                                                |                                                 |                                                                                                                                                                                 |                                                                                                                                                                                                                                                                                                                                                                                |      |
|--------------|----------------------------------------------------------------|-------------------------------------------------|---------------------------------------------------------------------------------------------------------------------------------------------------------------------------------|--------------------------------------------------------------------------------------------------------------------------------------------------------------------------------------------------------------------------------------------------------------------------------------------------------------------------------------------------------------------------------|------|
| Nguyen, 2012 | INS-1E cells                                                   | 0-40 $\mu$ M                                    | Stimulates insulin secretion and closes K-ATP channels                                                                                                                          | Calcium channels $\uparrow$ , PKA $\uparrow$ , PKC $\uparrow$                                                                                                                                                                                                                                                                                                                  | (51) |
| Ma, 2015     | Insulin-resistant 3T3-L1 adipocytes                            | 0.5-50 $\mu$ g/ml                               | Enhances glucose consumption                                                                                                                                                    | AMPK $\uparrow$                                                                                                                                                                                                                                                                                                                                                                | (20) |
| Wang, 2015   | Potassium oxonate-induced hyperuricemic mice<br><br>HK-2 cells | 10, 20 and 40 mg/kg<br><br>10,20 and 40 $\mu$ M | Reduces serum uric acid levels, improves renal function, promotes intestinal urate excretion, suppresses TLR4/MyD88 /NF- $\kappa$ B signaling and NLRP3 inflammasome activation | URAT1 $\downarrow$ , GLUT9 $\downarrow$ , ABCG2 $\uparrow$ , OAT1 $\uparrow$ , OCT1 $\uparrow$ , OCTN1 $\uparrow$ , OCTN2 $\uparrow$ , IL-1 $\beta$ $\downarrow$ , TLR4 $\downarrow$ , MyD88 $\downarrow$ , p-NF- $\kappa$ B $\downarrow$ , p-IKK $\beta$ $\downarrow$ , p-I $\kappa$ B $\alpha$ $\downarrow$ , NLRP3 $\downarrow$ , ASC $\downarrow$ , Caspase 1 $\downarrow$ | (52) |
| Li, 2018     | ICR mice<br><br>MDCK-hOCT1 cells and MDCK-hMATE1 cells         | 40 mg/kg<br><br>0.01-100 $\mu$ M                | Decreases the transcellular transport and intracellular accumulation of metformin and                                                                                           | MATE1 $\downarrow$ , OCT1 $\downarrow$                                                                                                                                                                                                                                                                                                                                         | (56) |

|            |                 |                                                 |                                                                                                                                                                                                                                                                                |                                                                                                                                      |       |
|------------|-----------------|-------------------------------------------------|--------------------------------------------------------------------------------------------------------------------------------------------------------------------------------------------------------------------------------------------------------------------------------|--------------------------------------------------------------------------------------------------------------------------------------|-------|
|            |                 |                                                 | attenuates the glucose-lowering effect of metformin                                                                                                                                                                                                                            |                                                                                                                                      |       |
| Cui, 2020  | NAFLD rat model | 20 mg/kg                                        | Reduces body weight, lipid levels and liver enzymes, improves hepatic steatosis and metabolic disorder                                                                                                                                                                         | PLA2 ↓ ,<br>PTDSS2 ↓ ,<br>FADS2 ↓ ,<br>CYP2E1 ↓ ,<br>CYP3A4 ↓ ,<br>PEMT↑,<br>LCAT↑                                                   | (130) |
| Liu, 2020  | BMMSCs          | 10 <sup>-7</sup> -<br>10 <sup>-4</sup><br>mol/l | Inhibits adipocyte differentiation                                                                                                                                                                                                                                             | cAMP↑,<br>PKA↑                                                                                                                       | (132) |
| Wang, 2020 | HFD-fed rats    | 10 mg/kg                                        | Prevents HFD-induced obesity, changes the diversity and composition of gut microbiota, reduces body weight and fat accumulation, ameliorates lipid metabolic disorders, improves HFD-induced disorders of endogenous metabolism, promotes SCFA production, enhances intestinal | TNF-α ↓ ,<br>IL-6 ↓ ,<br>IL-1 β ↓ ,<br>, LPS ↓ ,<br>IL-10↑,<br>SREBP-1 ↓ ,<br>FAS ↓ ,<br>ZO-1↑,<br>occludin↑ ,<br>PPARα↑,<br>PPARγ ↓ | (133) |

|            |                                                                                 |               |                                                                                                                                                              |                                                                                                                                                                                                                  |       |
|------------|---------------------------------------------------------------------------------|---------------|--------------------------------------------------------------------------------------------------------------------------------------------------------------|------------------------------------------------------------------------------------------------------------------------------------------------------------------------------------------------------------------|-------|
|            |                                                                                 |               | barrier integrity and reduces inflammation                                                                                                                   |                                                                                                                                                                                                                  |       |
| Shi, 2021  | HFD-induced obese mice, Caco-2 cells and HT-29 cells                            | 0-200 $\mu$ M | Reduces weight gain, fat accumulation and intestinal permeability, alters the composition of the gut microbiota and promotes the formation of autophagosomes | ZO-1 $\uparrow$ , JAM-1 $\uparrow$ , occludin $\uparrow$ , LPS $\downarrow$ , TNF- $\alpha$ $\downarrow$ , IL-6 $\downarrow$ , IL-1 $\beta$ $\downarrow$ , P62 $\downarrow$ , LC3II $\uparrow$ , Atg5 $\uparrow$ | (134) |
| Xu, 2022   | HFD-fed obese mice, 3T3-L1 preadipocytes, HepG2 hepatocytes and eWAT/adipocytes | 0-20 $\mu$ M  | Prevents HFD-induced obesity, attenuates hepatic steatosis, reduces lipid accumulation, improves dyslipidemia, glucose tolerance and insulin resistance      | p-AMPK $\uparrow$ , SREBP-1 $\downarrow$ , FAS $\downarrow$ , ACC $\downarrow$ , HSL $\uparrow$ , ATGL $\uparrow$ , FGF21 $\uparrow$ , ZAG $\uparrow$ , PPAR $\alpha$ $\uparrow$ , CPT1 $\alpha$ $\uparrow$      | (58)  |
| Tang, 2022 | Gestational diabetes mellitus mouse model                                       | 30 mg/kg      | Improves glucose intolerance, reduces lipid accumulation, elevates glycogen content within hepatocytes,                                                      | SREBP-1c $\downarrow$ , FASN $\downarrow$ , ACC $\downarrow$ , ACOX1 $\downarrow$ , PPAR $\alpha$ $\downarrow$ , G-6-Pase $\downarrow$ ,                                                                         | (59)  |

|           |                                                               |                                     |                                                                                                                                                              |                                                                                                                                            |      |
|-----------|---------------------------------------------------------------|-------------------------------------|--------------------------------------------------------------------------------------------------------------------------------------------------------------|--------------------------------------------------------------------------------------------------------------------------------------------|------|
|           |                                                               |                                     | diminishes placental lipid and glycogen depositions, ameliorates glycolipid disorders and corrects intestinal dysbacteriosis                                 | PEPCK<br>↓                                                                                                                                 |      |
| Du, 2022  | NAFLD mouse model<br><br>Primary hepatocytes and AML-12 cells | 10 and 30 mg/kg<br><br>0-200 μmol/l | Ameliorates hepatic steatosis and insulin resistance, regulates the mTORC1-TFEB-ALP axis and activates hepatic autophagy lysosomal pathway                   | IR↑,<br>Akt↑,<br>MDA ↓,<br>p-NK-κB ↓,<br>SOD↑,<br>GSH-Px↑,<br>IκBα↑,<br>TFEB↑,<br>P62 ↓,<br>LC3II↑,<br>LAMP1↑<br>,<br>CTSD↑,<br>p-mTORC1 ↓ | (60) |
| Sun, 2022 | HFD-induced NAFLD rat model                                   | 10 and 25 mg/kg                     | Elevates conjugated BA and non-12OH BA levels, regulates the gut microbiota, inhibits ileal FXR signaling, promotes BA synthesis, suppresses BA reabsorption | FXR ↓,<br>FGF15 ↓,<br>,<br>FGFR4 ↓,<br>,<br>ASBT ↓,<br>CYP7A1 ↑,<br>CYP27A1 ↑,<br>Fgfr4 ↓                                                  | (61) |

|                           |                                                             |                                                  |                                                                                                                                                                        |                                                                                                                                                                                                                                                                                    |         |
|---------------------------|-------------------------------------------------------------|--------------------------------------------------|------------------------------------------------------------------------------------------------------------------------------------------------------------------------|------------------------------------------------------------------------------------------------------------------------------------------------------------------------------------------------------------------------------------------------------------------------------------|---------|
|                           |                                                             |                                                  | and facilitates fecal BA excretion                                                                                                                                     |                                                                                                                                                                                                                                                                                    |         |
| Zhang, 2022               | Uric acid-induced HK-2 cell model<br><br>Hyperuricemic mice | 10, 20 and 40 $\mu$ M<br><br>10, 20 and 40 mg/kg | Suppresses PI3K/Akt and TLR4/I $\kappa$ B $\alpha$ /NF- $\kappa$ B signaling pathways, inhibits URAT1 activity, reduces uric acid levels and ameliorates kidney damage | URAT1 $\downarrow$ ,<br>GLUT9 $\downarrow$ ,<br>p-Akt $\downarrow$ ,<br>TLR4 $\downarrow$ ,<br>p-I $\kappa$ B $\alpha$ $\downarrow$ ,<br>p-p65 $\downarrow$ ,<br>TNF- $\alpha$ $\downarrow$ ,<br>IL-6 $\downarrow$ ,<br>IL-1 $\beta$ $\downarrow$                                  | (119)   |
| H, Antipsychotic effects  |                                                             |                                                  |                                                                                                                                                                        |                                                                                                                                                                                                                                                                                    |         |
| First author, year        | Models                                                      | Doses                                            | Biological activities                                                                                                                                                  | Molecular targets                                                                                                                                                                                                                                                                  | (Refs.) |
| Farrell, 2016             | 293T cells<br><br>C57BL/6J mice                             | 0-100 $\mu$ M<br><br>1-10 mg/kg                  | Blocks head-twitch responses, enhances amphetamine-induced locomotor activity and inhibits phencyclidine-induced locomotor activity                                    | 5-HT <sub>2A</sub> $\downarrow$ ,<br>5-HT <sub>2C</sub> $\downarrow$ ,<br>5-HT <sub>2B</sub> $\downarrow$ ,<br>5-HT <sub>7</sub> ,<br>D <sub>2</sub> , D <sub>5</sub> $\downarrow$ ,<br>5-HT <sub>6</sub> ,<br>$\downarrow$<br>5-HT <sub>1A</sub> ,<br>D <sub>4</sub> $\downarrow$ | (22)    |
| I, Anti-microbial effects |                                                             |                                                  |                                                                                                                                                                        |                                                                                                                                                                                                                                                                                    |         |
| First author, year        | Models                                                      | Doses                                            | Biological activities                                                                                                                                                  | Molecular targets                                                                                                                                                                                                                                                                  | (Refs.) |
| Kashiwada, 2005           | H9 T-cell line                                              | EC <sub>50</sub> , 0.8 $\mu$ g/ml; TI, 36.3      | Anti-HIV activity                                                                                                                                                      | NA                                                                                                                                                                                                                                                                                 | (40)    |
| Chan, 2016                | <i>Schistosoma mansoni</i>                                  | IC <sub>50</sub> , 0.62 $\pm$                    | Inhibits both basal and 5-HT evoked                                                                                                                                    | Sm.5HT RL $\downarrow$                                                                                                                                                                                                                                                             | (135)   |

|            |                                                           |                                              |                                      |    |      |
|------------|-----------------------------------------------------------|----------------------------------------------|--------------------------------------|----|------|
|            |                                                           | 0.22<br>μM                                   | motility of<br>adult<br>schistosomes |    |      |
| Yang, 2025 | lung<br>adenocarcin<br>oma<br>hACE2-<br>A549 cell<br>line | EC <sub>50</sub> ,<br>30.59<br>±13.5<br>8 μM | Anti-SARS-<br>CoV-2 activity         | NA | (41) |

TLR4, Toll-like receptor 4; PI3K, phosphatidylinositol 3-kinase; AKT, AKT serine/threonine kinase; MCP-1, monocyte chemoattractant protein-1; PGE2, prostaglandin E2; PPAR $\gamma$ , peroxisome proliferator-activated receptor  $\gamma$ ; TWEAK, tumor necrosis factor-related weak inducer of apoptosis; GSH, glutathione; PCNA, proliferating cell nuclear antigen; ROS, reactive oxygen species; GPX4, glutathione peroxidase 4; SLC7A11, solute carrier family 7 member 11; FSP1, ferroptosis suppressor protein 1; NO, nitric oxide; ATF2, activating transcription factor 2; AMPK, AMP-activated protein kinase; SREBP-1, sterol regulatory element-binding protein-1; HMGCR, 3-hydroxy-3-methylglutaryl-CoA reductase; IC<sub>50</sub>, half maximal inhibitory concentration; EC<sub>50</sub>, half maximal effective concentration; 5-HT, 5-hydroxytryptamine; URAT1, urate transporter 1; NAFLD, non-alcoholic fatty liver disease; HFD, high-fat diet; mTORC1, mechanistic target of rapamycin complex 1; TFEB, transcription factor EB; ALP, alkaline phosphatase; MDA, malondialdehyde; ACOX1, Acyl-CoA oxidase 1; PEPCK, phosphoenolpyruvate carboxykinase; IR, insulin receptor; CPT1 $\alpha$ , carnitine palmitoyltransferase 1 $\alpha$ ; LC3, microtubule-associated protein 1 light chain 3; LPS, lipopolysaccharide; PLA2, phospholipase A2; PTDSS2, phosphatidylserine synthase 2; FADS2, fatty acid desaturase 2; PEMT, phosphatidylethanolamine N-methyltransferase; LCAT, lecithin-cholesterol acyltransferase; CYP2E1, cytochrome P450 2E1; ZO-1, Zonula occludens-1; FAS, fatty acid synthase; PKA, protein kinase A; cAMP, cyclic adenosine monophosphate; GLUT9, glucose transporter 9; ABCG2, ATP-binding cassette sub-family G member 2; iNOS, inducible nitric oxide synthase; HK2, hexokinase 2; COX-2, cyclooxygenase-2; NFATc1, nuclear factor of activated T-cells 1; TRF6, TNF receptor-associated factor 6; PKM2, pyruvate kinase M2; LDHA, lactate dehydrogenase A; HO-1, heme

oxygenase-1; ADAMTS-5, A disintegrin and metalloproteinase with thrombospondin motifs 5; MMP-13, matrix metalloproteinase-13; CDK2, cyclin-dependent kinase 2; ATP6V0D2, ATPase H<sup>+</sup> transporting V0 subunit d2; OCN, osteocalcin; JNK, c-Jun N-terminal kinase; SOD, superoxide dismutase; SPHK, sphingosine kinase; FADS, fatty acid desaturase; GPT, glutamic-pyruvic transaminase; TUDCA, tauroursodeoxycholic acid; ICAM-1, intercellular adhesion molecule 1; Calm4, Calmodulin 4; LDH, lactate dehydrogenase; CAT, Catalase; C/EBP $\alpha$ , CCAAT/enhancer-binding protein  $\alpha$ ; ACC, acetyl-CoA carboxylase; MKK3, mitogen-activated protein kinase kinase 3; ILK, integrin-linked kinase.

Table SII. Nuciferine and its mechanisms against different types of cancer.

| A, Melanoma        |                                                                                               |                                                |                                                                                        |                                                                                                                                                                                                                                         |         |
|--------------------|-----------------------------------------------------------------------------------------------|------------------------------------------------|----------------------------------------------------------------------------------------|-----------------------------------------------------------------------------------------------------------------------------------------------------------------------------------------------------------------------------------------|---------|
| First author, year | Models                                                                                        | Treatment concentrations                       | Biological activities                                                                  | Molecular mechanisms                                                                                                                                                                                                                    | (Refs.) |
| Nakamura, 2013     | B16 melanoma 4A5 cells                                                                        | 0-100 $\mu$ M; IC <sub>50</sub> , 15.8 $\mu$ M | Inhibits melanogenesis                                                                 | Tyrosinase $\downarrow$ , TRP-1 $\downarrow$ , TRP-2 $\downarrow$                                                                                                                                                                       | (91)    |
| Wu, 2015           | A375 cells, A375.S2 cells and A2058 cells<br><br>BALB/c nude mice                             | 0-100 $\mu$ M<br><br>20 mg/kg                  | Induces autophagy, apoptosis and G <sub>2</sub> /M arrest                              | Beclin-1 $\uparrow$ , ATG-3, 5, 7, 10, 12, 16 $\uparrow$ , LC3II/I $\uparrow$ , cytochrome c $\uparrow$ , Apaf-1 $\uparrow$ , Caspase 3, 6, 7, 8, 9 $\uparrow$ , PARP $\uparrow$ , Bax $\uparrow$ , Bcl-2 $\downarrow$ , p53 $\uparrow$ | (92)    |
| Xu, 2020           | A375 cells, COLO829 cells, Malme-3M cells, SK-MEL-1 cells and SK-MEL-5 cells<br><br>Nude mice | 0-80 $\mu$ M<br><br>25-50 mg/kg                | Suppresses melanoma growth, inhibits cell survival, and inhibits tumor size and weight | p-p65 $\downarrow$ , TLR4 $\downarrow$ , TLR4/NF- $\kappa$ B signaling $\downarrow$                                                                                                                                                     | (16)    |
| B, Lung cancer     |                                                                                               |                                                |                                                                                        |                                                                                                                                                                                                                                         |         |
| First author, year | Models                                                                                        | Treatment concentrations                       | Biological activities                                                                  | Molecular mechanisms                                                                                                                                                                                                                    | (Refs.) |
| Liu, 2015          | A549 cells and H1299 cells                                                                    | A549 cells (0-50 $\mu$ mol/l);                 | Induces apoptosis ; inhibits cell                                                      | $\beta$ -catenin $\downarrow$ , c-Myc $\downarrow$ ,                                                                                                                                                                                    | (18)    |

|           |                                                                                            |                                                                               |                                                                                                                                                                                                                    |                                                                                                                                      |      |
|-----------|--------------------------------------------------------------------------------------------|-------------------------------------------------------------------------------|--------------------------------------------------------------------------------------------------------------------------------------------------------------------------------------------------------------------|--------------------------------------------------------------------------------------------------------------------------------------|------|
|           | BALB/c nude mice                                                                           | H1299 cells (0-1 $\mu$ mol/l)<br><br>50 mg/kg                                 | proliferation, migration, invasion and suppresses tumor growth                                                                                                                                                     | cyclin D1 $\downarrow$ , VEGF-A $\downarrow$ , Axin $\uparrow$ , Bax $\uparrow$ , Bcl-2 $\downarrow$                                 |      |
| Liu, 2020 | A549 and ABCB1-overexpressing drug-resistant A549/T cell line<br><br>A549/T xenograft mice | 48, 24 and 4 $\mu$ M<br><br>7.5 mg/kg                                         | Overcomes drug resistance to chemotherapeutic agents, boosts apoptosis and arrests MDR cells in G <sub>2</sub> /M-phase; modulates the P-gp ATPase activity; inhibits the PI3K/Akt and MAPK/ERK signaling pathways | P-gp $\downarrow$ , BCRP $\downarrow$ , p-ERK1/2 $\downarrow$ , p-Akt $\downarrow$ , Nrf2 $\downarrow$ , HIF-1 $\alpha$ $\downarrow$ | (97) |
| Bai, 2022 | LA795 cells<br><br>BALB/c nude mice                                                        | 0-50 $\mu$ M;<br>IC <sub>50</sub> , 4.94 $\pm$ 1.49 $\mu$ M<br><br>30 $\mu$ M | Inhibits cell proliferation, migration,                                                                                                                                                                            | TMEM16A $\downarrow$ , p-MEK1/2 $\downarrow$ , p-ERK1/2 $\downarrow$ , cyclin D1 $\downarrow$ ,                                      | (93) |

|                      |                                              |                                          | promotes cell apoptosis and enhances cancer therapy effect of cisplatin            | $\beta$ -catenin ↓ ,<br>E-cadherin ↑ ,<br>N-cadherin ↓ ,<br>vimentin ↓ ,<br>cleaved-caspase 3 ↑ ,<br>cleaved-caspase 9 ↑ |         |
|----------------------|----------------------------------------------|------------------------------------------|------------------------------------------------------------------------------------|--------------------------------------------------------------------------------------------------------------------------|---------|
| Gautam, 2025         | A549 cells<br><br>C57BL/6 mice               | 10 and 20 $\mu$ M<br><br>20 and 40 mg/kg | Restores oxidative balance, reduces inflammation and alleviates pulmonary fibrosis | $\alpha$ -SMA ↓ ,<br>CTGF ↓ ,<br>collagen I ↓ ,<br>fibronectin ↓ ,<br>E-cadherin ↑ ,<br>N-cadherin ↓ ,<br>vimentin ↓     | (94)    |
| C, Neuroblastoma     |                                              |                                          |                                                                                    |                                                                                                                          |         |
| First author, year   | Models                                       | Treatment concentrations                 | Biological activities                                                              | Molecular mechanisms                                                                                                     | (Refs.) |
| Qi, 2016             | SY5Y cells<br><br>Nude mice                  | 0-200 $\mu$ g/ml<br><br>9.5 mg/kg        | Inhibits cell viability and invasion; decreases tumor weight                       | p-Akt ↓ ,<br>PI3K ↓ ,<br>IL-1 $\beta$ ↓ ,<br>PI3K-Akt signaling ↓                                                        | (95)    |
| D, Colorectal cancer |                                              |                                          |                                                                                    |                                                                                                                          |         |
| First author, year   | Models                                       | Treatment concentrations                 | Biological activities                                                              | Molecular mechanisms                                                                                                     | (Refs.) |
| Qi, 2016             | CT26 cells and HCT116 cells<br><br>Nude mice | 0-200 $\mu$ g/ml<br><br>9.5 mg/kg        | Inhibits cell invasion and viability, and                                          | p-Akt ↓ ,<br>PI3K ↓ ,<br>IL-1 $\beta$ ↓ ,<br>PI3K-Akt signaling ↓                                                        | (95)    |

|                  |                                                              |                      |                                                                                                                                                                                                                |                                                                                                                                      |      |
|------------------|--------------------------------------------------------------|----------------------|----------------------------------------------------------------------------------------------------------------------------------------------------------------------------------------------------------------|--------------------------------------------------------------------------------------------------------------------------------------|------|
|                  |                                                              |                      | decreases tumor weight                                                                                                                                                                                         |                                                                                                                                      |      |
| Liu, 2020        | HCT-8 and drug-resistant HCT-8/T cell line                   | 48, 24 and 4 $\mu$ M | Overcomes drug resistance to chemotherapeutic agents, boosts apoptosis and arrests MDR cells in G <sub>2</sub> /M-phase, modulates the P-gp ATPase activity, inhibits PI3K/Akt and MAPK/ERK signaling pathways | P-gp $\downarrow$ , BCRP $\downarrow$ , p-ERK1/2 $\downarrow$ , p-Akt $\downarrow$ , Nrf2 $\downarrow$ , HIF-1 $\alpha$ $\downarrow$ | (97) |
| Okayama, 2024    | HT-29 human colon cancer cell line and its cancer stem cells | 0-50 $\mu$ M         | Anti-proliferative activity, cytotoxic activity via inhibition of Wnt/ $\beta$ -catenin pathway                                                                                                                | c-Myc $\downarrow$ , survivin $\downarrow$ , active- $\beta$ -catenin $\downarrow$                                                   | (96) |
| E, Breast cancer |                                                              |                      |                                                                                                                                                                                                                |                                                                                                                                      |      |

| First author, year   | Models                                                | Treatment concentrations                         | Biological activities                                                                                                                                                      | Molecular mechanisms                                                                                   | (Refs.) |
|----------------------|-------------------------------------------------------|--------------------------------------------------|----------------------------------------------------------------------------------------------------------------------------------------------------------------------------|--------------------------------------------------------------------------------------------------------|---------|
| Kang, 2017           | MDA-MB-231 cells and MCF-7 cells                      | 0-80 $\mu$ M;<br>IC <sub>50</sub> , 17.9 $\mu$ M | Decreases cell viability, migration and invasion, induces cell apoptosis, inhibits RANKL-induced osteoclast formation and induces G <sub>1</sub> and G <sub>2</sub> arrest | Cleaved-caspase 3 $\uparrow$ , cleaved PARP $\uparrow$ , Bcl-2 $\downarrow$ , procaspase3 $\downarrow$ | (98)    |
| Tong, 2021           | SKBR3 cells, HCC1806 cells and MDA-MB-231 cells       | 0-1.6925 $\mu$ M                                 | Does not inhibit migration and does not affect cell viability                                                                                                              |                                                                                                        | (99)    |
| F, Pancreatic cancer |                                                       |                                                  |                                                                                                                                                                            |                                                                                                        |         |
| First author, year   | Models                                                | Treatment concentrations                         | Biological activities                                                                                                                                                      | Molecular mechanisms                                                                                   | (Refs.) |
| Zhou, 2019           | PANC-1 cells and ASPC-1 cells<br><br>BALB/c nude mice | 0-80 $\mu$ M<br><br>30 mg/kg                     | Enhances the sensitivity of PC cells to gemcitabine, attenuates                                                                                                            | p-YAP (Ser127) $\uparrow$ , p-AMPK $\uparrow$ , HMGCR $\downarrow$ , YAP $\downarrow$                  | (101)   |

|                                      |                                               |                                           | gemcitabine resistance of PC cells and inhibits PC proliferation                |                                                                                                                                                    |         |
|--------------------------------------|-----------------------------------------------|-------------------------------------------|---------------------------------------------------------------------------------|----------------------------------------------------------------------------------------------------------------------------------------------------|---------|
| G, Laryngeal squamous cell carcinoma |                                               |                                           |                                                                                 |                                                                                                                                                    |         |
| First author, year                   | Models                                        | Treatment concentrations                  | Biological activities                                                           | Molecular mechanisms                                                                                                                               | (Refs.) |
| Li, 2021                             | AMC-HN-8 cells and TU-212 cells               | 0-100 $\mu$ M                             | Inhibits cell survival and displays antitumor activity                          | TRIM44 $\downarrow$ , TLR4 $\downarrow$ , p-Akt $\downarrow$                                                                                       | (102)   |
| H, Oral squamous cell carcinoma      |                                               |                                           |                                                                                 |                                                                                                                                                    |         |
| First author, year                   | Models                                        | Treatment concentrations                  | Biological activities                                                           | Molecular mechanisms                                                                                                                               | (Refs.) |
| Xie, 2023                            | SCC25 and CAL27 cells<br><br>BALB/c nude mice | 0, 40, 80 and 120 $\mu$ M<br><br>20 mg/kg | Inhibits proliferation, promotes apoptosis, and inhibits migration and invasion | STAT3 $\downarrow$ , p65 $\downarrow$ , Bcl-2 $\downarrow$ , Bax $\uparrow$ , caspase 3 $\uparrow$ , E-cadherin $\uparrow$ , vimentin $\downarrow$ | (17)    |
| I, Hepatocellular carcinoma          |                                               |                                           |                                                                                 |                                                                                                                                                    |         |
| First author, year                   | Models                                        | Treatment concentrations                  | Biological activities                                                           | Molecular mechanisms                                                                                                                               | (Refs.) |
| Li, 2025                             | HepG2 and HCCLM3 cells                        | 0, 25, 50, 100 and 200                    | Suppresses proliferation                                                        | Cyclin B1 $\downarrow$ , survivin $\downarrow$ , HER2 $\downarrow$ , p-                                                                            | (103)   |

|  |                     |                     |                                                                                             |                                    |  |
|--|---------------------|---------------------|---------------------------------------------------------------------------------------------|------------------------------------|--|
|  | BALB/c<br>nude mice | $\mu$ M<br>15 mg/kg | ion and<br>cell cycle<br>at G <sub>2</sub><br>phase,<br>and<br>accelerat<br>es<br>apoptosis | Akt ↓ , p-<br>ERK1/2 ↓ ,<br>PI3K ↓ |  |
|--|---------------------|---------------------|---------------------------------------------------------------------------------------------|------------------------------------|--|

TRP-1, tyrosinase-related protein 1; ATG-3, autophagy related 3; Apaf-1, apoptotic protease activating factor 1; PARP, poly(ADP-ribose) polymerase; BAX, Bcl-2 associated X protein; Bcl-2, B-cell lymphoma 2; TLR4, Toll-like receptor 4; VEGF, vascular endothelial growth factor; TMEM16A, transmembrane protein 16A; MEK1/2, mitogen-activated protein kinase 1/2; BCRP, breast cancer resistance protein; Nrf2, nuclear factor erythroid 2-related factor 2; HIF-1 $\alpha$ , hypoxia-inducible factor 1 $\alpha$ ;  $\alpha$ -SMA,  $\alpha$ -smooth muscle actin; CTGF, connective tissue growth factor; PI3K, phosphatidylinositol 3-kinase; Akt, serine/threonine kinase; IL-1 $\beta$ , interleukin 1 $\beta$ ; YAP, Yes-associated protein; AMPK, AMP-activated protein kinase; HMGCR, 3-Hydroxy-3-methylglutaryl-CoA reductase; TRIM44, tripartite motif containing 44; STAT3, signal transducer and activator of transcription 3; HER2, human epidermal growth factor receptor 2.

Table SIII. Inhibitory effects of nuciferine on different enzymes (targets).

| First author, year | Enzyme (target) source     | IC <sub>50</sub> | K <sub>i</sub> | (Refs.) |
|--------------------|----------------------------|------------------|----------------|---------|
| Hu, 2010           | CYP1A2                     | 2.12 mmol/l      |                | (28)    |
| Ye, 2014           | CYP2D6                     | 3.78 μM          | 1.88 μM        | (27)    |
|                    | CYP2C9                     | 94.88 μM         |                |         |
|                    | CYP2C19                    | 29.00 μM         |                |         |
| Zhang, 2018        | β <sub>2</sub> -AR         | 15.8±2.6 μM      | 0.091 μM       | (114)   |
|                    | 5-HT <sub>2A</sub>         | 7.18±0.03 nM     |                |         |
|                    | 5-HT <sub>2B</sub>         | 7.51±0.21 nM     |                |         |
|                    | 5-HT <sub>2C</sub>         | 7.44±0.01 nM     |                |         |
| Heng, 2018         | α <sub>1A</sub>            | 7.42±0.07 nM     |                | (115)   |
|                    | α <sub>1B</sub>            | 7.22±0.01 nM     |                |         |
|                    | α <sub>1D</sub>            | 6.78±0.01 nM     |                |         |
| Liu, 2020          | <i>Mucor miehei</i> lipase | 0.194 mg/ml      | 0.16 mg/ml     | (29)    |
| Guan, 2023         | TNF-α                      | 61.19 μM         |                | (116)   |

CYP, cytochrome P450; β<sub>2</sub>-AR, β<sub>2</sub>-adrenergic receptor.

Table SIV. Molecular docking proteins of Nuciferine through an *in silico* study.

| First author,<br>year | Proteins                      | Binging energy,<br>kcal/mol | Interacting residues                                                                                          | (Refs.) |
|-----------------------|-------------------------------|-----------------------------|---------------------------------------------------------------------------------------------------------------|---------|
| Liu, 2020             | <i>Mucor miehei</i><br>lipase | -6.13                       | Arg169, Asp238,<br>Tyr195, P194,<br>Ile193, Gly219,<br>Gly192, Ser237 and<br>Glu220                           | (29)    |
| Gao, 2020             | CYP1A1                        | -2.1636                     | Arg106, Thr385, Ile386,<br>Ala317, Ser122,<br>Arg135, Arg455,<br>His388                                       | (55)    |
|                       | CYP1A2                        | -2.7153                     | Thr321, Cys458,<br>Leu382, Thr124,<br>Leu144, Gly460,<br>Ile314, Ile459, Ala317,<br>Gly318                    |         |
|                       | CYP2B6                        | -1.74                       | Thr302, Gly438,<br>Ala298, Gly299, Ile114,<br>Cys436, Leu363,<br>Phe429, Leu362                               |         |
|                       | CYP2C9                        | -1.3183                     | Thr301, Gly298,<br>Ala297, Cys435,<br>Val113, Ser429,<br>Ser365, Leu391,<br>Leu366, Leu362,<br>Phe428, Pro427 |         |
|                       | CYP2D6                        | -2.2814                     | Thr309, Cys443,<br>Ala305, Val374,<br>Gly373, Pro435,<br>Phe436, Val370,<br>Gln364, Ile369                    |         |
|                       | CYP3A4                        | -1.3802                     | Arg105, Arg130,<br>Arg440, Ile118,<br>Cys442, Gly444,<br>Phe302, Ile443, Ile301,<br>Ala305, Ser119            |         |
| Wen, 2021             | PI3K                          | -7.29                       | Ser594, Asp632,<br>Asn634, Pro563,<br>Leu564, Leu567,<br>Lys591, Gln629,                                      | (77)    |

|                      |                                   |        |                                                                                                                                          |       |
|----------------------|-----------------------------------|--------|------------------------------------------------------------------------------------------------------------------------------------------|-------|
|                      |                                   |        | Asn634, Ile1029,<br>Ser1032                                                                                                              |       |
| Harishkumar,<br>2021 | $\beta$ 2 adrenergic<br>receptors | -5.02  | Lys140, Gln229,<br>Glu1005                                                                                                               | (84)  |
|                      | $\beta$ 1 adrenergic<br>receptors | -8.46  | Val122, Thr126, Ser211                                                                                                                   |       |
| Du, 2022             | HBXIP                             | NA     | Thr36, Glu40, His41,<br>Val44, Ile45, Gly72,<br>Ile74, His87                                                                             | (60)  |
| Khan, 2022           | $\alpha$ -amylase                 | NA     | Lys35, Trp396                                                                                                                            | (73)  |
|                      | $\alpha$ -glycosidase             | NA     | Trp484, Glu456,<br>Glu173, Glu474,<br>Glu480                                                                                             |       |
| Zheng, 2022          | DRD2                              | -7.92  | Phe389, Trp386,<br>Thr412, Tyr416,<br>Cys118, Asp114,<br>Val115, Phe189, Ile184,<br>Ser193, Val190,<br>Ser194, Phe390,<br>His393, Ile122 | (100) |
| Zhang, 2022          | COX-2                             | -5.78  | Lys328                                                                                                                                   | (118) |
| Zhang, 2022          | URAT1                             | -7.44  | Lys393, Phe364                                                                                                                           | (119) |
| Xue, 2023            | AMPK                              | -6.732 | Glu94, Glu100, Glu143,<br>Asp157, Met93,<br>Tyr95, Val96, Leu22,<br>Leu146, Ala156, Ala43,<br>Ile77, Val30                               | (47)  |
| Guan JW,<br>2023     | TNF- $\alpha$                     | -8.4   | Tyr119, Ser60                                                                                                                            | (116) |
| Veerichetty,<br>2023 | AbTYR                             | -7.0   | Glu356, Thr308                                                                                                                           | (121) |
|                      | Human<br>tyrosinase               | -7.3   | Glu241                                                                                                                                   |       |
| Zhao, 2023           | 5HT2A<br>receptor                 | -5.86  | NA                                                                                                                                       | (122) |
| Zhou, 2023           | Beclin 1                          | 5.895  | Thr267, Lys263                                                                                                                           | (123) |
|                      | ATG5                              | 4.832  | Leu157, Asn159,<br>Lys51, Leu37,                                                                                                         |       |

|              |         |                |                                                                                            |       |
|--------------|---------|----------------|--------------------------------------------------------------------------------------------|-------|
|              |         |                | Val48, Pro40, Leu47,<br>Leu39,<br>Asp160, Gln158                                           |       |
|              | LC3-II  | 5.588          | Asn84, Lys39, Arg37,<br>Tyr38,<br>Glu36, Val112, Ile34,<br>Tyr110,<br>Met111, Leu82, Gly85 |       |
|              | p62     | 6.713          | Gly62, Phe63, Gln64,<br>Ser78,<br>Glu45, Ser49, Leu48,<br>Ala52, Pro60                     |       |
| Ishrat, 2024 | HPAA    | -5.58          | Trp58, Trp59, Tyr62,<br>Gln63, Asp300, Asp356                                              | (120) |
| Li, 2024     | NF-κB   | -5.71±0.09     | Asp266, Thr304,<br>Val303                                                                  | (37)  |
|              | NLRP3   | -6.35±0.07     | Glu47, Glu15                                                                               |       |
| Peng, 2024   | PTEN    | -8.1           | Tyr176, Arg172, Ile300,<br>Ile303, Glu299                                                  | (78)  |
| Li, 2025     | PI3K    | -6.33          | Ser594, Asn634                                                                             | (30)  |
| Rapuru, 2025 | PTGS2   | -9.33          | Gln203, His207,<br>His388                                                                  | (31)  |
|              | JUN     | -7.05          | Gln671                                                                                     |       |
| Li, 2025     | JAK2    | -7.5903±0.7926 | Gly993                                                                                     | (71)  |
| Ding, 2025   | TAS2R46 | -8.20±0.28     | Ser248                                                                                     | (117) |
| Li, 2025     | FGF15   | -7.58          | NA                                                                                         | (124) |
|              | FXR     | -9.56          | NA                                                                                         |       |

URAT1, urate transporter 1; HBXIP, hepatitis B X-interacting protein; COX-2, cyclooxygenase-2; PTGS2, prostaglandin-endoperoxide synthase 2; JAK2, Janus kinase 2; TAS2R46, Taste 2 receptor member 46; JUN, Jun proto-oncogene, AP-1 Subunit; PTEN, phosphatase and tensin homolog; NLRP3, NLR family pyrin domain containing 3; DRD2, dopamine receptor d2; AMPK, AMP-activated protein kinase; NF-κB, nuclear factor-kappa B; FGF15, fibroblast growth factor 15; FXR, farnesoid X receptor; HPAA, hypothalamic-pituitary-adrenal axis; ATG5, Autophagy related 5; AbTYR, abalone tyrosinase; CYP1A1, cytochrome P450 family 1 subfamily A member 1.

Table SV. Various drug delivery carriers containing nuciferine.

| First author, year | Carrier                                             | Model system            | Inferences                                                                                    | (Refs.) |
|--------------------|-----------------------------------------------------|-------------------------|-----------------------------------------------------------------------------------------------|---------|
| Liu, 2017          | PLGA nanoparticles                                  | HepG2 cells and SD rats | Sustains and controls drug delivery with improved bioavailability for alleviating lipogenesis | (24)    |
| Zhu, 2022          | NF-EGCG double-encapsulated microgel                | HFD-fed rats            | Improves the diversity of gut microbiota reducing harmful bacteria                            | (26)    |
| Bharathi, 2023     | 3D-printed PLA scaffolds loaded with CS-NF hydrogel | Mouse MSCs (C3H10T1/2)  | Promotes new bone formation                                                                   | (25)    |
| Lu, 2024           | Nuciferine-liposomes                                | HFD-fed obese dogs      | Improves relative bioavailability and exerts an anti-obesity effect in dogs                   | (125)   |

HFD, high-fat diet; PGLA, poly lactic-co-glycolic acid; PLA, polylactic acid; MSC, mesenchymal stem cells; EGCG, epigallocatechin-3-gallate; SD, Sprague-Dawley; CS-NF, Chitosan-Nuciferine.
